# Supplementary material for: Synthesizing long-term sea level rise projections – the MAGICC sealevel model
Source: Copernicus journal article supplement (doi:10.5194/gmd-2016-233), 2016-10-05
Supplement: Supplementary file [file gmd-2016-233-AC3-supplement.pdf]

**Table A.1.** List of variables and free parameters used for the individual MAGICC sea level component calibrations.

| Climate variables        | Unit              | Description                                                                  |
|--------------------------|-------------------|------------------------------------------------------------------------------|
| $tas$                    | $K$               | surface air temperature                                                      |
| $thetao$                 | $K$               | potential ocean temperature                                                  |
| $zostoga$                | $mm$              | thermal expansion                                                            |
| MAGICC ocean parameters  |                   |                                                                              |
| $K_z$                    | $\frac{cm^2}{s}$  | vertical thermal diffusivity                                                 |
| $\frac{dK_{ztop}}{dT}$   | $\frac{cm^2}{sK}$ | sensitivity to global mean $tas$ at the mixed layer boundary                 |
| $\eta$                   | $K$               | sea-ice adjustment offset                                                    |
| $\gamma$                 | $\frac{1}{K}$     | sea-ice adjustment factor                                                    |
| $w_0$                    | $\frac{m}{yr}$    | initial upwelling velocity                                                   |
| $\beta$                  |                   | ratio of changes in temperature of entraining waters to polar sinking waters |
| $\frac{\Delta w_t}{w_t}$ |                   | ratio of variable to fixed upwelling for every time step                     |
| $T_{w_t}$                | $K$               | threshold temperatures for constant upwelling rates                          |
| $\phi$                   |                   | global thermal expansion scaling                                             |
| Glacier parameters       |                   |                                                                              |
| $\kappa$                 | $\frac{1}{K}$     | glacier sensitivity                                                          |
| $\nu$                    |                   | temperature sensitivity exponent                                             |
| Greenland SMB parameters |                   |                                                                              |
| $v$                      | $\frac{mm}{K}$    | temperature sensitivity                                                      |
| $\chi$                   |                   | relative magnitude of linear and non-linear terms                            |
| $\varphi$                |                   | temperature sensitivity exponent                                             |
| Greenland SID parameters |                   |                                                                              |
| $q$                      |                   | discharge sensitivity                                                        |
| $\epsilon$               | $\frac{1}{K}$     | temperature sensitivity                                                      |
| $GIS_{max}^{outlet}$     | $mm$              | maximum Greenland outlet glacier volume                                      |
| Antarctic SMB parameters |                   |                                                                              |
| $\xi$                    | $\frac{mm}{K}$    | temperature sensitivity                                                      |
| $\rho$                   |                   | relative magnitude of linear and non-linear terms                            |
| $\sigma$                 |                   | temperature sensitivity exponent                                             |
